# Supplementary material
Source: PubMed Central journal article supplement (PMC6192606)
Supplement: supp_the2017-0629_onco12440-sup-0002-suppinfo02.pdf [file supp_the2017-0629_onco12440-sup-0002-suppinfo02.pdf]

**Supplementary Table S2.** The targeted genetic status in the younger and older groups.

| Age groups                      | The younger group | The older group | P      |
|---------------------------------|-------------------|-----------------|--------|
|                                 | ≤45               | >45             |        |
| EGFR mutation                   | 49                | 47              | 0.651  |
| KRAS mutation                   | 3                 | 17              | 0.002  |
| ALK arrangement                 | 14                | 1               | <0.001 |
| BRAF mutation                   | 3                 | 1               | 0.362  |
| MET mutation                    | 0                 | 2               | 0.497  |
| RET arrangement                 | 1                 | 1               | 1.000  |
| ROS1 arrangement                | 0                 | 3               | 0.246  |
| <sup>a</sup> HER2 mutation      | 5                 | 2               | 0.272  |
| CDKN2A mutation                 | 1                 | 0               | 0.492  |
| <sup>b</sup> HER2 amplification | 1                 | 0               | 0.492  |
| HRAS mutation                   | 1                 | 0               | 0.492  |
| MAP2K1 mutation                 | 1                 | 0               | 0.492  |
| <sup>c</sup> STK11 mutation     | 0                 | 3               | 0.246  |
| Unknown                         | 8                 | 13              | 0.355  |
| Total                           | 87                | 90              |        |

a, b and c: Most of the targeted genetic alterations, including EGFR, KRAS, ALK, BRAF, MET, RET and ROS1, are exclusive genotypes and don't overlap each other. While more than one actionable alteration was identified in partial patients, only the actionable alteration with the most optimal clinical option, such as on-label agents will be counted. The younger group vs. the older group: P<0.05.
