# Supplementary material
Source: PubMed Central journal article supplement (PMC6192606)
Supplement: supp_the2017-0629_onco12440-sup-0004-suppinfo04.pdf [file supp_the2017-0629_onco12440-sup-0004-suppinfo04.pdf]

Supplementary Table S4. The reported studies on targeted genetic alterations in young lung cancer patients

| Author                                | Pathology | Groups      | No.   | Test    | EGFR               | KRAS             | ALK              | BRAF           | RET  | ROS1            | HER2           | Reference           |
|---------------------------------------|-----------|-------------|-------|---------|--------------------|------------------|------------------|----------------|------|-----------------|----------------|---------------------|
| Ting Ye, et al.                       | AC        | ≤40 years   | 36    | non-NGS | 52.8%              | 8.3%             | 5.6%             | 0.0%           | 2.8% | /               | 0.0%           | PMID:<br>25364516   |
|                                       |           | >40 years   | 87    | non-NGS | 63.3%              | 3.4%             | 4.6%             | 3.4%           | 1.1% | /               | 2.3%           |                     |
| Kosuke Tanaka, et al                  | AC        | ≤40 years   | 81    | non-NGS | 29.6%              | 2.5%             | 40.7%            | 0.0%           | 2.5% | 2.5%            | 4.9%           | PMID:<br>28177518   |
|                                       |           | >40 years   | 1665  | non-NGS | 45.3%              | 9.9%             | 4.2%             | /              | /    | /               | /              |                     |
| Barbara Gitlitz, et al.               | AC        | ≤40 years   | 71    | NGS     | 24.0%              | /                | 45.0%            | /              | 3.0% | 7.0%            | 3.0%           | 2015 WCLC:<br>P1.49 |
| Chiara Catania, et al.                | AC        | ≤40 years   | 34    | non-NGS | 14.7%              | 14.7%            | 26.5%            | /              | /    | /               | 0.0%           | PMID:<br>25832878   |
| Osamu Nagashima, et al.               | AC        | ≤40 years   | 12    | non-NGS | 33.3%              | /                | 41.7%            | /              | /    | /               | /              | PMID:<br>23372947   |
| Christopher J. VandenBussche, et al.  | AC        | ≤50 years   | /     | non-NGS | 20.0%<br>(10/50)   | 25.5%<br>(13/51) | 11.6%<br>(5/43)  | /              | /    | /               | /              | PMID:<br>25288236   |
| Lucia Kim, et al.                     | AC        | ≤40 years   | 31    | non-NGS | 22.6%              | /                | 3.2%             | /              | /    | /               | /              | PMID:<br>22969248   |
|                                       |           | >50 years   | 261   | non-NGS | 24.9%              | /                | 5.0%             | /              | /    | /               | /              |                     |
| Chia-Hung Hsu, et al.                 | NSCLC     | ≤45 years   | 1074  | non-NGS | 52.5%              | /                | /                | /              | /    | /               | /              | PMID:<br>27191886   |
|                                       |           | >45 years   | 20462 | non-NGS | 60.6%              | /                | /                | /              | /    | /               | /              |                     |
| Shang-Gin Wu, et al.                  | AC        | ≤50 years   | 161   | non-NGS | 57.8%              | /                | /                | /              | /    | /               | /              | PMID:<br>28717642   |
|                                       |           | >50 years   | 878   | non-NGS | 66.1%              | /                | /                | /              | /    | /               | /              |                     |
| Stefania Scarpino, et al.             | AC        | ≤40 years   | /     | non-NGS | 17.4%<br>(4/23)    | /                | 30.4%<br>(7/23)  | /              | /    | 18.2%<br>(4/22) | /              | PMID:<br>27237034   |
|                                       |           | 41-50 years | /     | non-NGS | 10.9%<br>(6/55)    | /                | 13.0%<br>(6/46)  | /              | /    | 0.0%<br>(0/24)  | /              |                     |
|                                       |           | >50 years   | /     | non-NGS | 16.3%<br>(116/711) | /                | 6.0%<br>(34/568) | /              | /    | 1.2%<br>(4/330) | /              |                     |
|                                       |           | Total       | /     | non-NGS | 16.0%<br>(126/789) | /                | 7.4%<br>(47/637) | /              | /    | 2.1%<br>(8/376) | /              |                     |
| <sup>a</sup> Adrian G. Sacher, et al. | NSCLC     | <40 years   | /     | non-NGS | 32.1%<br>(25/78)   | 9.1%<br>(6/66)   | 19.1%<br>(13/68) | 0.0%<br>(0/62) | /    | 5.6%<br>(3/54)  | 1.6%<br>(1/63) | PMID:<br>26720421   |
|                                       |           | 40-49 years | /     | non-NGS | 34.0%              | 13.3%            | 12.8%            | 0.5%           | /    | 1.9%            | 5.2%           |                     |

|           |   |         |            |            |           |           |   |           |           |
|-----------|---|---------|------------|------------|-----------|-----------|---|-----------|-----------|
|           |   |         | (80/235)   | (28/210)   | (26/203)  | (1/195)   |   | (3/154)   | (10/192)  |
| ≥50 years | / | non-NGS | 24.6%      | 29.2%      | 3.0%      | 1.6%      | / | 1.2%      | 2.3%      |
|           |   |         | (435/1765) | (459/1570) | (45/1512) | (23/1438) |   | (14/1160) | (33/1419) |
| Total     | / | non-NGS | 26.0%      | 26.7%      | 4.7%      | 1.4%      | / | 1.5%      | 2.6%      |
|           |   |         | 540/2078   | (493/1846) | (84/1783) | (24/1695) |   | (20/1368) | (44/1674) |

<sup>a</sup>In this study, HER2 exon 20 and BRAF V600E were detected. AC: adenocarcinoma; NSCLC: non small cell lung cancer.
